# Supplementary material for: X chromosome escapee genes are involved in ischemic sexual dimorphism through epigenetic modification of inflammatory signals
Source: PubMed Central journal article supplement (PMC7953638; doi:10.1186/s12974-021-02120-3), 2021-03-12
Supplement: 12974_2021_2120_MOESM1_ESM.pdf [file 12974_2021_2120_MOESM1_ESM.pdf]

**Additional file for**

**X chromosome escapee genes are involved in ischemic sexual dimorphism  
through epigenetic modification of inflammatory signals**

Shaohua Qi<sup>1, Δ</sup>, Abdullah Al Mamun<sup>1, Δ</sup>, Conelius Ngwa<sup>1</sup>, Sharmeen Romana<sup>1</sup>, Rodney Ritzel<sup>2</sup>, Arthur P. Arnold<sup>3</sup>, Louise D. McCullough<sup>1</sup>, Fudong Liu<sup>\*, 1</sup>

<sup>1</sup>Department of Neurology, The University of Texas Health Science Center at Houston, McGovern Medical School, 6431 Fannin Street, Houston, TX 77030, US

<sup>2</sup>Department of Anesthesiology, Center for Shock, Trauma and Anesthesiology Research (STAR) Center, University of Maryland School of Medicine, Baltimore, MD, USA

<sup>3</sup>Department of Integrative Biology and Physiology, UCLA, 610 Charles Young Drive South, Los Angeles, CA 90095, USA

<sup>Δ</sup>These authors contribute equally to this work

\* Corresponding author: Fudong Liu

Department of Neurology, McGovern Medical School,

University of Texas Health Science Center at Houston, 6431 Fannin Street, Houston, TX 77030, USA.

Email: [Fudong.Liu@uth.tmc.edu](mailto:Fudong.Liu@uth.tmc.edu)

Tel/Fax: +1 (713) 500-7038

**This PDF file includes:**

Supplementary online material:

Supplementary Figure 1: **Volcano plot of the RNA-seq showing *kdm5c/6a* gene expression in aged male and female microglia.**

Supplementary Figure 2: **KDM6A/KDM5C are not expressed on astrocytes.**

Supplementary Figure 3: **No sex difference in KDM6A/5C expression in neurons.**

Supplementary Figure 4: **Irf4/5 gene levels with H3K4me1/3 and H3K27me1/3 modification in normoxia and OGD treated aged microglia culture.**

Supplementary Figure 5: **KDM6A/5C mRNA levels in lentivirus and siRNA treated microglia.**

Supplementary Figure 6: **Anti-inflammatory cytokines levels after *Kdm6a* siRNA and lentivirus treatment.**

Supplementary Figure 7: **Pro-inflammatory cytokines levels after *Kdm5c* siRNA and lentivirus treatment.**

Supplementary Figure 1:

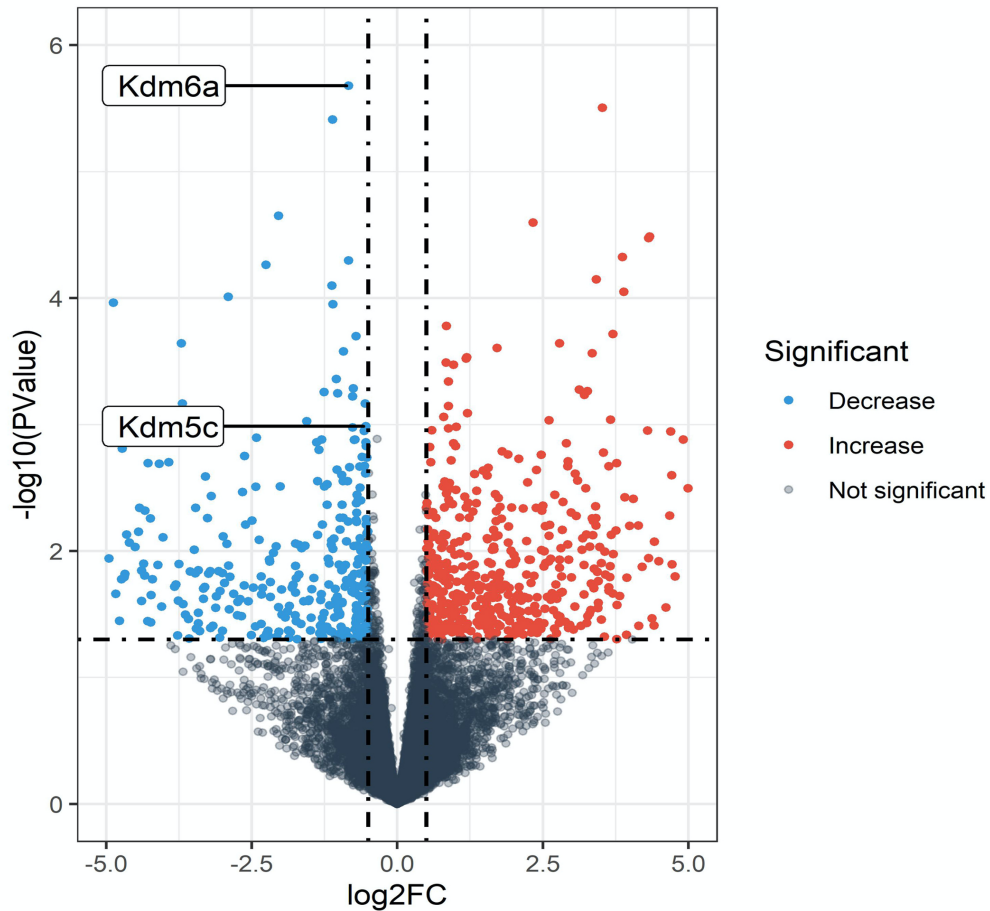

**Volcano plot of the RNA-seq showing *kdm5c/6a* gene expression in aged male vs. female microglia.** RNA-seq was performed in flow-sorted microglia from aged male and female mice brain tissue. The vertical axis (y-axis) corresponds to the mean expression value of  $-\log_{10}(\text{P value})$ , and the horizontal axis (x-axis) displays the  $\log_2$  fold change value. The red dots indicate the RNAs with up-regulated expression (male vs. female), the blue dots indicate the RNAs with down-regulated expression, and the black dots indicate the RNAs with no significant differences between groups. The expression fold change (male/female)  $>1.5$  and with FDR adjusted  $P < 0.05$  are considered statistically significant.

Supplementary Figure 2:

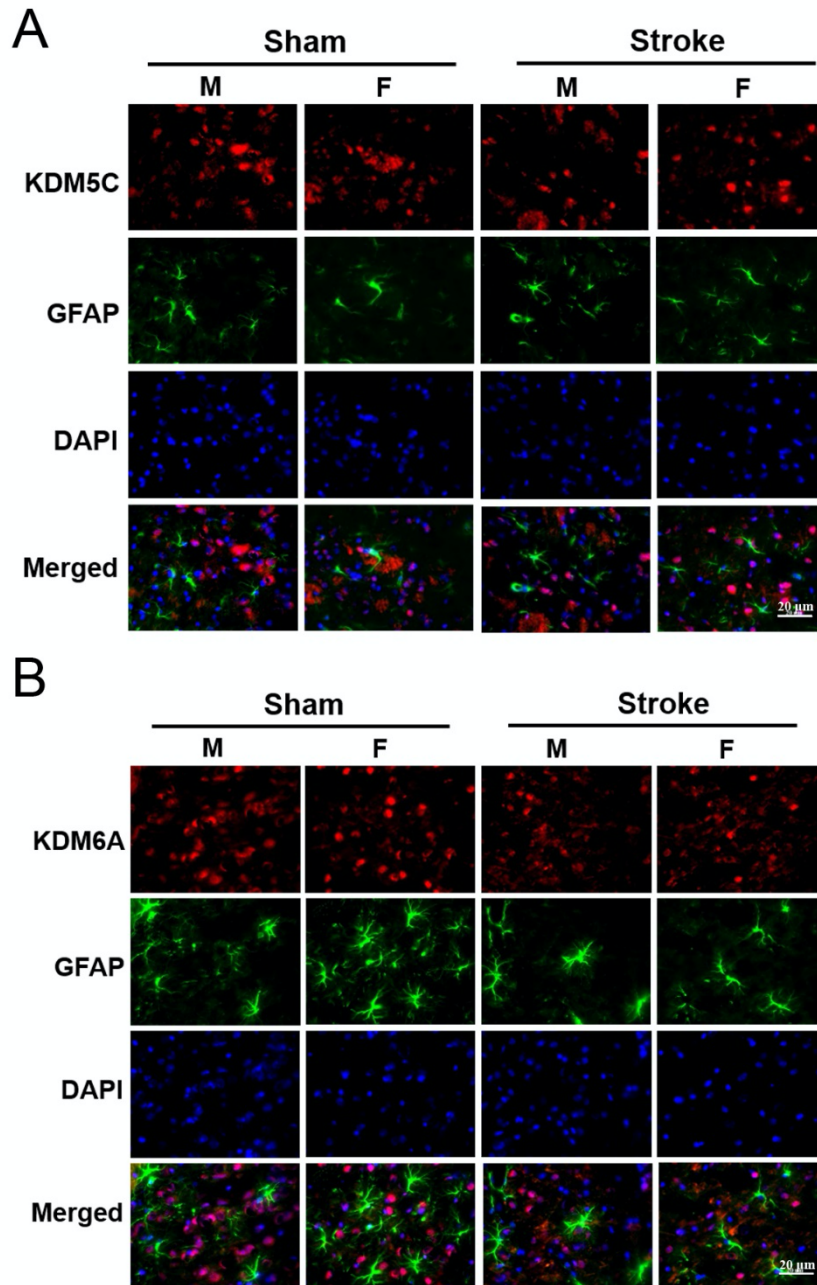

**KDM6A/KDM5C are not expressed on astrocytes.** (A-B) Peri-infarct area of the WT aged mice brains were stained with KDM5C/KDM6A (red), GFAP (green) and DAPI (blue). Scale bar = 20 $\mu$ m (63x).

Supplementary Figure 3:

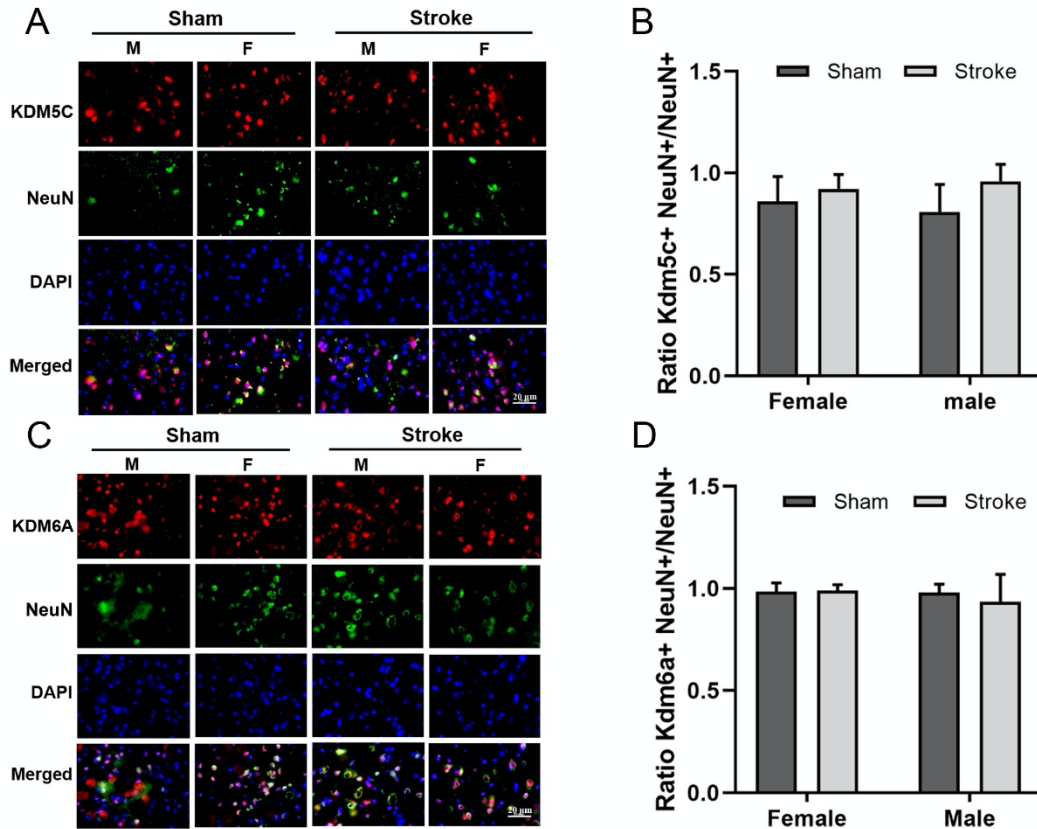

**No sex difference in KDM6A/5C expression in neurons.** (A and C) Peri-infarct area of the WT aged mice brains were stained with KDM5C/KDM6A (red), NeuN (green) and DAPI (blue). (B and D) Semi-quantification of the ratios of KDM5C<sup>+</sup>/KDM6A<sup>+</sup> & NeuN<sup>+</sup> cells over total NeuN<sup>+</sup> cells. n=5 animals/group. Scale bar = 20 $\mu$ m (63x).

Supplementary Figure 4:

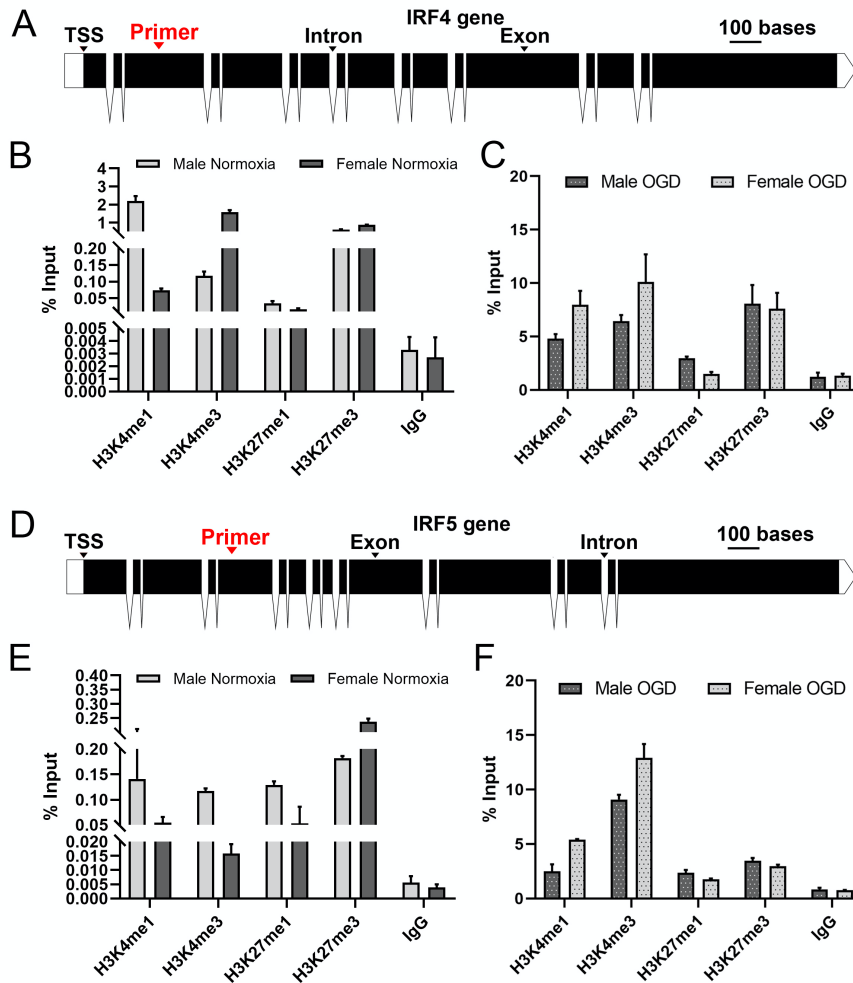

**Ir4/5 gene levels with H3K4me1/3 and H3K27me1/3 modification in normoxia and OGD treated aged microglia culture.** (A and D) The schematic diagram indicates the structure of *irf4* and *irf5* genes, including the TSS, exons, introns and primer sites. Scale bar = 100 bases. (B-C & E-F) The percentage of IRF4 (B&C) and IRF5 (E&F) DNA levels in the input precipitated by Histone H3K4me1/3 and H3K27me1/3 antibodies, measured by CHIP-RT-PCR at ORF region of *irf4/5* genes in normoxia and OGD treated condition. Microglia were flow-sorted from aged male and female mice. IgG antibody served as a negative control for histone methylation antibodies. Data were averaged from 3-4 independent experiments. n=5-6 mice/group.

Supplementary Figure 5:

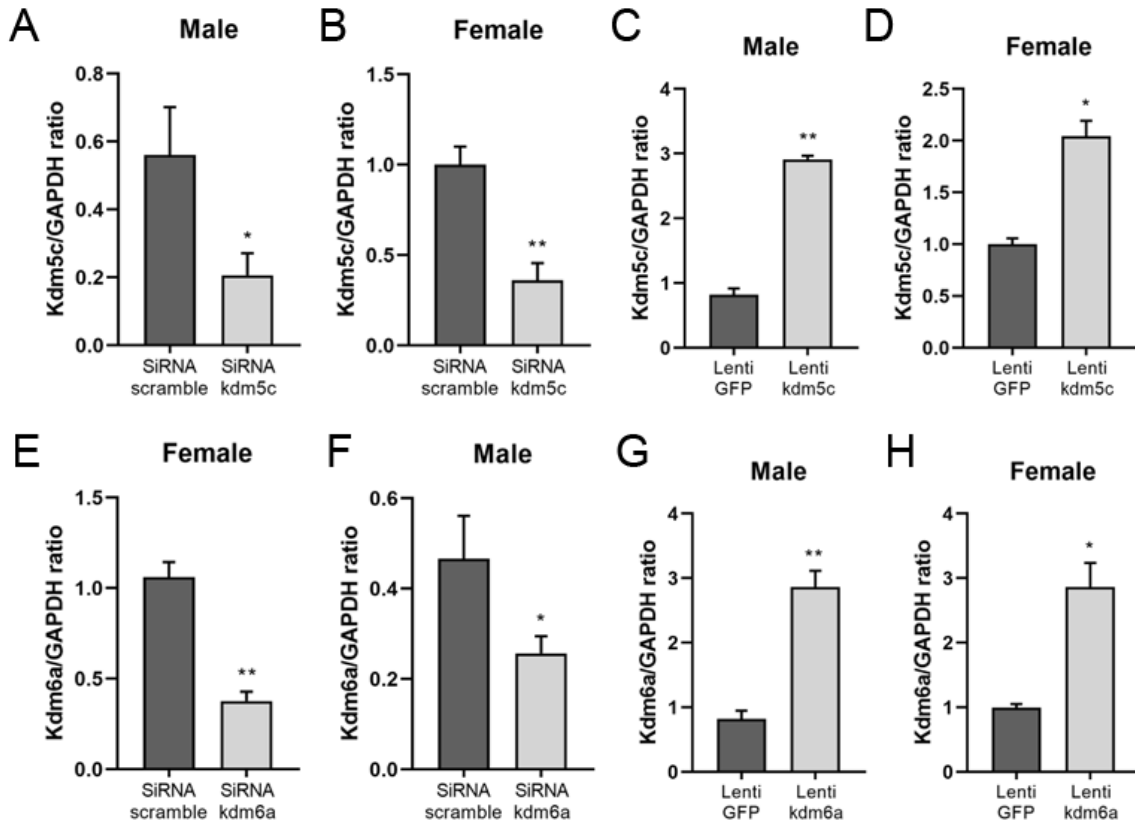

**KDM6A/5C mRNA levels in lentivirus and siRNA treated microglia.** (A-H) *Kdm5c* and *Kdm6a* gene mRNA levels were measured by RT-PCR in neonatal microglia after KDM5C/KDM6A siRNA or lenti-KDM5C/KDM6A treatment. Data were averaged from 3-4 independent experiments. n=5-6 pups/group; \*p < 0.05; \*\*p < 0.01 vs. control groups.

Supplementary Figure 6:

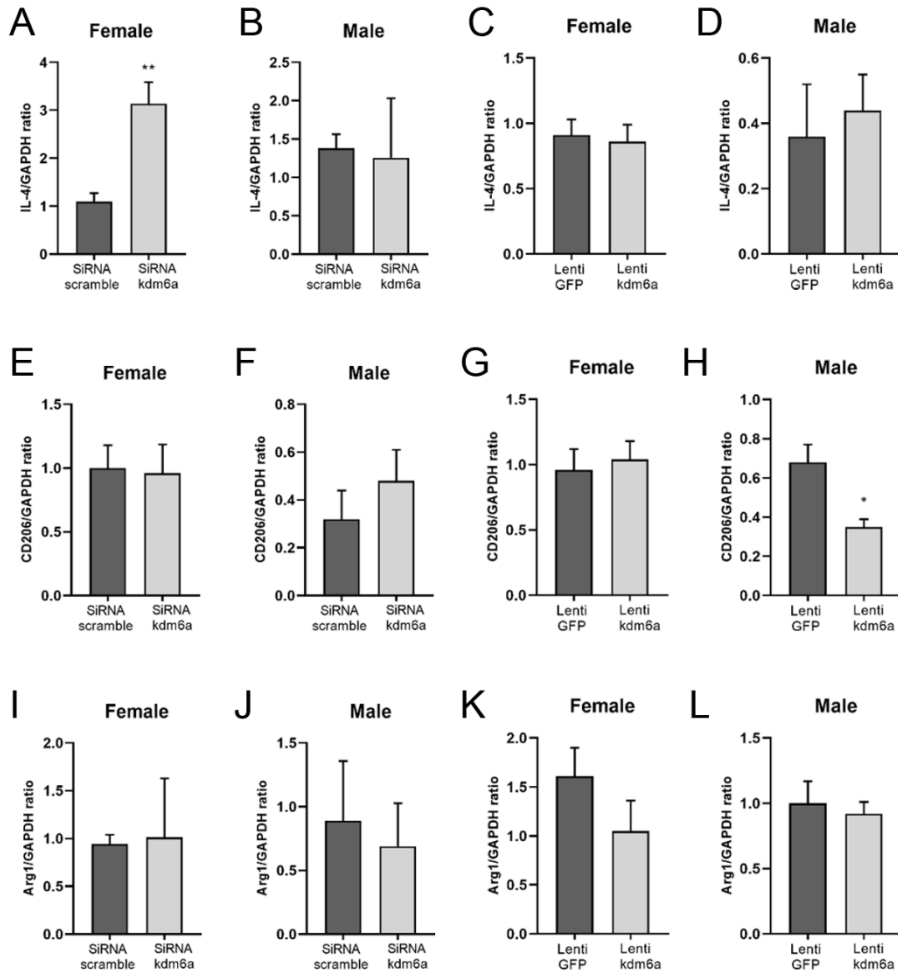

**Anti-inflammatory cytokines levels after *Kdm6a* siRNA and lentivirus treatment.**

(A-L) Anti-inflammation cytokines IL-4, CD206 and Arg1 gene mRNA levels were measured by RT-PCR in neonatal microglia. Data were averaged from 3-4 independent experiments. n=5-6 pups/group, \*p < 0.05; \*\*p < 0.01 vs. control groups.



Supplementary Figure 7:

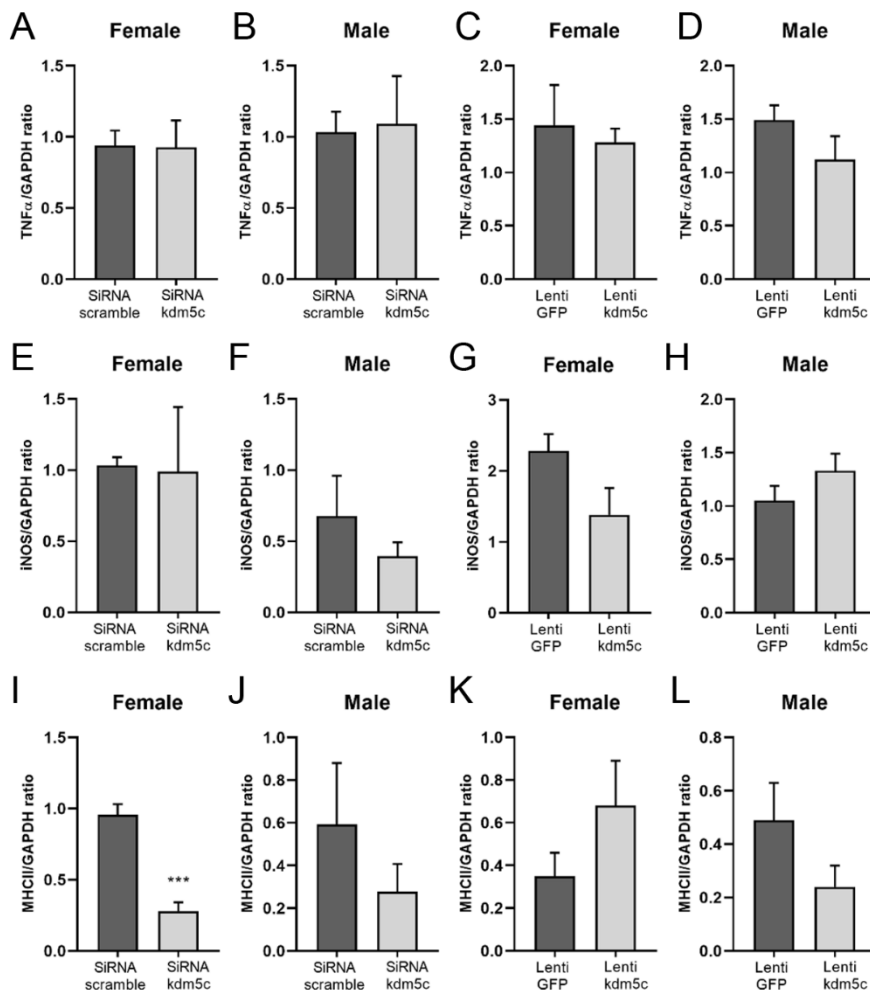

**Pro-inflammatory cytokines levels after *Kdm5c* siRNA and lentivirus**

**treatment.** (A-L) Pro-inflammation cytokines TNF $\alpha$ , iNOS and MHCII gene

mRNA levels were measured by RT-PCR in neonatal microglia. Data were

averaged from 3-4 independent experiments. n=5-6 pups/group, \*\*\*p < 0.001 vs.

control groups.
